# Supplementary material
Source: Copernicus journal article supplement (doi:10.5194/egusphere-2026-759)
Supplement: Supplementary file [file egusphere-2026-759-AC1-supplement.pdf]

**Reviewer 1:**

Novelty of the study:

Thus, the novelty of this work requires further clarification. The authors should explicitly state what is new or improved compared to previous studies. Earlier research has already shown that QBO teleconnections tend to be too weak in models. The present study largely revisits this conclusion using the recent availability of large ensembles from models with spontaneously generated QBOs.

Moreover, the discussion and summary rely heavily on findings from previous studies, with limited new insights. Overall, the manuscript concludes that the use of large ensembles provides a clearer picture of how well models simulate QBO teleconnections; however, this contribution needs to be more clearly articulated in terms of its originality and added value.

**The key point of this paper is that the conclusion from many previous studies - QBO teleconnections are systematically too weak - is an oversimplification. This is stated clearly in the abstract and Discussion. More generally, the abstract highlights many aspects of this work which are clearly different from any previous paper:**

- 1. The magnitudes of these teleconnections are statistically indistinguishable from those observed in two of the models; this is a notable improvement from previous work that analyzed small ensembles.**
- 2. These large-scale teleconnections lead to surface temperature and precipitation anomalies over the mid-latitude continents, including an impact on western North America surface temperature which appears to have not been noted before.**
- 3. Remarkably, one of the models simulates a connection between the QBO and the Madden Julian Oscillation that mimics observations, although it remains too weak. This is nonetheless notably better than many previous studies using climate models**
- 4. Finally, the LESFMIP simulations allow an exploration of external forcings impacting the magnitude of teleconnections. Among these experiments, greenhouse gas forcing is seen to significantly influence the subtropical wind horseshoe of the QBO.**

**All of these issues are discussed in the Discussion section at length.**

**We have also added to the introduction:**

**“Here, we revisit these relationships using a factor of 20 to 100 more model output, while also discovering new surface impacts of the QBO that appear to not have been noted before Here, we revisit these relationships using a factor of 20 to**

**100 more model output and isolating how external forcings may modulate their strength.”**

**We have added to the Discussion section:**

**“These discrepancies stand out more clearly in our study than in any previous work due to the huge amount of data examined.”**

**“The downward arching wind response in the subtropical Pacific sector also strengthens after 1970 in the hist-GHG experiment, likely because the QBO's lower stratospheric MMC strengthens in response to a reduction of lower stratospheric static stability forced by increased GHGs.”**

**“Overall, the use of large ensembles has allowed us to develop a clearer picture of how well models simulate QBO teleconnections while revealing surface impacts over North America that appear to not have been noticed before”**

Technical errors:

The current study requires technical corrections. The figures appear to have been prepared in a rather casual manner, particularly with respect to font sizes, consistent notation, titles, color bar levels, and axis labels. Also, there is random use of abbreviations in the text without introduce them. The authors should ensure consistency in notation and presentation throughout the manuscript.

Some of these issues have been highlighted in the specific comments; however, it has not been possible to identify all of them due to the large number of inconsistencies.

**We have corrected the issues raised by the reviewer as described below, and also made similar edits to other figures.**

Specific comments:

Second paragraph 2 (33-43). Also, emphasize the routes associated with these three distinct mechanisms.

**For all three mechanisms, we briefly discuss the route by which the remote influence occurs. Since this paper is not about diagnosing mechanisms, we do**

**Commented [1]:** again, I feel like this reviewer didn't closely read the paper

**not think it is appropriate to provide a detailed description, especially since the paper is already long.**

L77 Use the QBO E and QBO W instead of eQBO and wQBO .

**We use eQBO and wQBO throughout the paper.**

L118 remove “also”

**We prefer to keep “also” in this sentence**

L119 “NH”, Abbreviations should be defined at first use by providing the full term. Replace “(all but IPSL6)” with “ but except IPSL6”

**corrected**

L125 “the mean meridional circulation of the QBO” with “the QBO mean meridional circulation (MMC)”, and further use of this abbreviation.

**Changed as suggested**

L130 “on the other hand”. Move it to the beginning of the sentence.

**Changed as suggested**

L148 -149 In ERA5....., rewrite the sentence with more clarity.

**Changed to “In ERA5, on the other hand, the response peaks in December and January, but is no longer significant in February.”**

L 152, “larger uncertainty in observation”, please specify them briefly

**We mean that the error bars on the observed response are very large in February. We have simplified this sentence to “Conversely, in March, the regression coefficients in HadGEM3 and in MIROC6 are significantly larger than those based on ERA5. In February, it is not possible to confidently identify a model bias when comparing with ERA5.”**

L171 “ Northern Hemisphere” Please refer to the comment at line 119, where the abbreviation “NH” is used without first defining the full term. Insert a full stop after ‘Europe’ and begin a new sentence.”

**Changed as suggested, though we prefer a comma after Europe. We have shortened the sentence to make it tighter.**

L172 North Atlantic Oscillation, the abbreviation NAO has already been introduced.

**Changed as suggested**

L173 “previous work...” Include one or two most relevant citations instead of referring to the Introduction.

**Changed as suggested**

Corrections in figures:

Fig.1 Interchange the left and right sides of the y-axis, i.e., place the pressure scale on the left side and the height scale on the right side. Also, ensure a clear separation between the y-axis label and the unit text.”

**We prefer leaving the y-axis as is. We have increased the separation between km and the y-axis label for figures 1-3 and 13**

Set the colorbar scale at appropriate intervals to avoid crowding or spacing. In subsequent Fig. 3, the left panel shows only the extreme values on the colorbar, whereas the right panel includes intermediate values as well.

**Changed as suggested for figures 1-3, and also figure 10 and 13**

Colorbar scale unit is “m/s per 10 m/s” but for the supplement (Figure S5) “m/s”. Same inconsistency in other figures and their supplementary.

**This colorbar scale unit is correct as is. Figure 1 is showing regression, while the supplement is showing a composite approach. No changes made.**

Proper use of title. Text Uzaregress is confusing, do you mean “Uza regression”? Same for Tzaregress ?

**Changed as suggested**

In Fig.2 caption “x-es”?

**Changed to “stippling”**

Fig,4 Shift panel (a1)---.. at title level.

**We prefer to keep it inside the panel**

Revise 'Uza60N10hPa' to 'Uza 60N 10hPa'. The spacing used for longitude- latitude- pressure variables is inconsistent; please ensure a consistent format is maintained throughout the manuscript.

**Changed as suggested, and also for figure 5**

Main title should start capital letter i.e. "regression" to "Regression".

**Changed as suggested (also for figure 5). We have also made the font properties similar for the ERA5 row and for the LESFMIP rows.**

Fig.6 The box size for the calculation can be extended over the entire significant region, rather than being restricted to a very small core region.

**We prefer to focus on the core region in order to more closely match the region of significant anomalies in ERA5 (which is shifted to the west of that in the models). See Supplemental Figure S10. We have expanded the region 5degrees further east.**

Fig. 10 Use the same colour code as in Figure 9

**It is standard practice in IPCC reports and in journal articles in our field to use a different color scheme for precipitation than for other variables. No changes made.**

S10 -S12 Display the x- and y-axis labels with adequate spacing for better readability (Figs. 6, 7, 9, 12 too)

**We prefer to not include the longitude and latitude labels to keep the figure cleaner**

The above suggestions are only indicative; please review all figures carefully to ensure consistency and improved presentation.
